# Supplementary material for: Efficient CRISPR/Cas9 mediated Pooled-sgRNAs assembly accelerates targeting multiple genes related to male sterility in cotton
Source: Plant Methods. 2021 Feb 8;17:16. doi: 10.1186/s13007-021-00712-x (PMC7869495; doi:10.1186/s13007-021-00712-x)
Supplement: Supplementary file 2 — Additional file 2. List of the selected sgRNAs and their corresponding genes. [file 13007_2021_712_MOESM2_ESM.xlsx]

## Sheet: Sheet1
Number	sgRNA	targeted genes
TR01	CTCATCTTCAGGAAGCGGTGAGG	Gh_A07G2334	Gh_D07G2404	Gh_Sca248041G01
TR02	AGGCAGCTCCACCCATCGTTTGG	Gh_A07G2334	Gh_D07G2404	Gh_Sca248041G01
TR03	CGGCCCGGTTAATCGAACAACGG	Gh_A07G2334	Gh_D07G2404
TR04	CTCGGATCCGGCCAAGCAAACGG	Gh_A07G2334	Gh_D07G2404
TR05	GATCGACTCGAACCGTGGTTCGG	Gh_A05G3926	Gh_D05G0456
TR06	AGTCGATCGCCGTGTCGTGAGGG	Gh_A05G3926	Gh_D05G0456
TR07	CCTCTGCCCAACAAGAAGATGGG	Gh_A03G0180	Gh_D03G1404
TR08	GAGACGATTGGCAACAGGCGAGG	Gh_A03G0180	Gh_D03G1404
TR09	GGATTCACTTCGCCAGACAGGGG	Gh_A05G3926	Gh_D05G0456	Gh_Sca114723G01
TR10	AGGATTCACTTCGCCAGACAGGG	Gh_A05G3926	Gh_D05G0456	Gh_Sca114723G01
TR11	TCTGAGGTAGGAGTAGGGGCCTGG	Gh_A11G2112	Gh_D11G2424
TR12	ACCAAACGCAAGAGCGACAAGGG	Gh_A11G2112	Gh_D11G2424
TR13	AAGCTCGGATTGTACAAGCGCGG	Gh_A12G1590	Gh_D12G1722
TR14	CGGATTGTACAAGCGCGGGAGGG	Gh_A12G1590	Gh_D12G1722
TR15	CGGCAGGGCGAGTTGATGTTCGG	Gh_A12G1705	Gh_D12G1867
TR16	CAGGGCGAGTTGATGTTCGGAGG	Gh_A12G1705	Gh_D12G1867
TR17	CATCTACCAGGCGTAATGATGGG	Gh_A07G0469	Gh_D07G0534
TR18	ATTGAACCCATCATTACGCCTGG	Gh_A07G0469	Gh_D07G0534
TR19	TTACGGCTATCATTCCTAGAAGG	Gh_A04G1202	Gh_D04G1812
TR20	AATGGGGCTCAATCTCCTGTGGG	Gh_A04G1202	Gh_D04G1812
TR21	TCACTTCTATCCCACACAATAGG	Gh_A03G1115	Gh_D02G1543
TR22	AATGGGGCTTTATCTCCTGTGGG	Gh_A03G1115	Gh_D02G1543
TR23	TTGTTTCCTTACGCTACCGGCGG	Gh_A03G1685	Gh_D02G2105
TR24	TGTCGAGGTCCGAATCCCGGAGG	Gh_A03G1685	Gh_D02G2105
TR25	CCACAACTACAGCAATCGTGCGG	Gh_A11G1758	Gh_D11G1915
TR26	CAACTACAGCAATCGTGCGGCGG	Gh_A11G1758	Gh_D11G1915
TR27	TAAGTATCGCTAATGTCGGGCGG	Gh_A13G0593	Gh_D13G0534
TR28	CTTACCTTCTGCGAGGACTGCGG	Gh_A13G0593	Gh_D13G0534
TR29	GCTCTTCGACAAGTACGGGAAGG	Gh_A03G1524	Gh_D13G0534
TR30	TTCCCGTACTTGTCGAAGAGCGG	Gh_A03G1524	Gh_D13G0534
TR31	AGACGGATGCCGTATCATTGTGG	Gh_A06G1561	Gh_D06G1819
TR32	TTGCATCATCAGCATCTCTAGGG	Gh_A06G1561	Gh_D10G2133	Gh_A10G1868	Gh_D06G1819	Gh_A05G2993	Gh_D04G0785
TR33	ACATGTTTAGCAGATACGGGAGG	Gh_A10G1868	Gh_D10G2133
TR34	TTGAATGGTCGAGACTTAGATGG	Gh_A10G1868	Gh_D10G2133
TR35	ACATGTTTAGCAGATATGGGAGG	Gh_A13G0202	Gh_D13G0216	Gh_A05G2993
TR36	ACAAACGAGTGCCACCGCGTCGG		Gh_D13G0216
TR37	AAAGGCGTGTACCACTACCGCGG	Gh_A05G2993	Gh_D04G0785
TR38	CCTAGGTATGATGACCGCCGCGG	Gh_A05G2993	Gh_D04G0785	Gh_A10G1868	Gh_D10G2133
TR39	AAGCAGCGACCAGATCCAGGAGG	Gh_A01G2151	Gh_D01G2121
TR40	AGATATTCCCGAGAACCTCGTGG	Gh_A01G2151
TR41	AATGCTGCAATAGTCCCGACCGG	Gh_A03G1792	Gh_D02G2225
TR42	ATTCTTCATATTCAGCCAGGGGG	Gh_A03G1792	Gh_D02G2225
TR43	CACGCCTCCTTGATAAGCCGAGG	Gh_A05G2345	Gh_D05G2612
TR44	AGCCGAGGCTTAACATAGAGAGG	Gh_A05G2345	Gh_D05G2612
TR45	GGTGGGAGAAAAAAGTAGATAGG	Gh_A05G2345	Gh_D05G2612	Gh_Sca087992G01
TR46	TGTAGAACTTTGAAGCTAGCTGG	Gh_A05G2345	Gh_D05G2612	Gh_Sca087992G01
TR47	TATGCGGCAATGGTACCAACTGG	Gh_A09G1085	Gh_D13G1259	Gh_A13G1012	Gh_D09G1094
TR48	GTAAACACCTTGATCCACGTTGG	Gh_A09G1085
TR49	TATGCGGCAATGGTACCAACTGG	Gh_A13G1012	Gh_D13G1259	Gh_A09G1085	Gh_D09G1094
TR50	CACGCCTCCTTGATAAGCCAAGG	Gh_A13G1012	Gh_D13G1259
TR51	ACAACCTTCGGAGACTACCACGG	Gh_A08G1108	Gh_D08G1389
TR52	GTCGTCAGCTCCTTTCTCCGTGG	Gh_A08G1108	Gh_D08G1389
TR53	GTAATCTGGACCGCTAACAGGGG	Gh_A05G0432	Gh_D05G0565
TR54	CAGAAACAATGTGACATCCGAGG	Gh_A05G0432	Gh_D05G0565
TR55	GCTTGGGCCACAAACACTACCGG	Gh_A10G0657	Gh_D10G0736
TR56	AGCATCTCAGATGCAATGGGTGG	Gh_A10G0657	Gh_D10G0736
TR57	TATACTCCATCTCCGCCCAGAGG	Gh_A06G0936	Gh_D06G1163
TR58	CCATCTCCGCCCAGAGGCTACGG	Gh_A06G0936	Gh_D06G1163
TR59	TACCCAGTATAATAATCCCGAGG	Gh_A04G0456	Gh_D04G0909
TR60	TTACAGTCCCTCGCCACCAAGGG	Gh_A04G0456	Gh_D04G0909
TR61	TCCTGGTCTTGACTACGAAAGGG	Gh_A10G0929	Gh_D03G1046	Gh_D10G0845	Gh_D06G2335
TR62	GAAGTTATGCAGCAACTGCATGG	Gh_A10G0929	Gh_D03G1046	Gh_D06G1026	Gh_D10G0845	Gh_D06G2335
TR63	GAAGTTATGCAGCAACTGCATGG	Gh_A10G0929	Gh_D03G1046	Gh_D10G0845	Gh_D06G2335	Gh_D06G1026
TR64	TTTAGCAGCCTTTCACCTAATGG	Gh_D06G1026	Gh_D10G0845	Gh_D06G2335
TR65	GCATAAAGCTCTAAACACAGTGG	Gh_A10G0929	Gh_D10G0845
TR66	TGTTCATGAGTGATGCAGGATGG	Gh_A10G0929	Gh_D10G0845
TR67	TGCATTTCGGAGCTCAGCATCGG	Gh_A10G0024	Gh_D10G0026	Gh_Sca154836G01
TR68	CATTCTCCTCATCGTTGTTGTGG	Gh_A05G0975	Gh_D05G1084	Gh_D10G0026	Gh_A10G0024	Gh_Sca191171G01	Gh_Sca154836G01
TR69	GATGTGGTATAGCCTGCCCGAGG	Gh_A02G0932	Gh_D02G2403
TR70	TTAAGAAGTCCGGAGAACTGGGG	Gh_A02G0932	Gh_D02G2403
TR71	TCAAGGACTGGATCTTTCGGAGG	Gh_A02G0932	Gh_D10G0026	Gh_A05G0975	Gh_D05G1084
TR72	ATGTTAGTCCACCGGACTGAGGG	Gh_A10G0024	Gh_D10G0026
TR73	GTAGCAATGCCCTATACTGGTGG	Gh_A06G2107	Gh_A10G0024
TR74	AGGCCCATTGAATTCCTCTGGGG	Gh_A06G2107	Gh_D02G2403	Gh_A02G0932
TR75	TCATCCGGTCCACAATCTGGTGG	Gh_A05G0975	Gh_D05G1084
TR76	GGCATCGGAGATGATCACGAGGG	Gh_A11G3237	Gh_A07G2170	Gh_A01G1971
TR77	ACAACATCTGAAACACGAGGAGG	Gh_A11G3237	Gh_A07G2170
TR78	TGCCTTCTATCCCTAAAGGAAGG	Gh_A03G0760	Gh_D02G1098
TR79	ATAGGCATGACACTGGACATAGG	Gh_A03G0760	Gh_D02G1098
TR80	GTTACCCTAGTAGCAATCCAAGG	Gh_A13G1973	Gh_D13G2369
TR81	AGAGAACCGAGTATCTTGATCGG	Gh_A13G1973	Gh_D13G2369
TR82	GCAGACACGGATCTGTTATCAGG	Gh_A07G1559	Gh_D07G1726
TR83	ACGTGCGAAGAAAGCCGCCAAGG	Gh_A07G1559	Gh_D07G1726
TR84	TTAGGGTTCCGTCATGTGCAGGG	Gh_A12G2520	Gh_D12G0038
TR85	TTCAGAGTCCGAATCGGACGAGG	Gh_A12G2520	Gh_D12G0038
TR86	ATTGGTGCCTGACCCCCTAGGGG	Gh_A06G1509
TR87	ATCTGCCTCGAAAGGCTTGGTGG	Gh_A06G1509
TR88	ATAGACGCAGACCATCTGATCGG	Gh_D06G1876	Gh_D06G1877
TR89	CCAAGCTTCGACCGATCAGATGG	Gh_A06G1509	Gh_D06G1876	Gh_D06G1877
TR90	AGCAGCTTGCTGCAGATTAGAGG	Gh_A06G1733	Gh_D06G2245
TR91	CGTTACCACCATAAACGTGGAGG	Gh_A10G1137	Gh_D10G1360	Gh_Sca070505G01
TR92	GAAGGTTGAGATCGATCGGACGG	Gh_A13G1627
TR93	GGTTGAGATCGATCGGACGGAGG	Gh_A13G1627
TR94	TTAACGTCTTGGCCATCCGCAGG	Gh_A05G0413	Gh_D05G0530
TR95	GGAATATCGGGTCATCATAGCGG	Gh_A05G0413	Gh_D05G0530
TR96	CGGGGCTTCATTATGCCACGCGG	Gh_A03G1622	Gh_D02G2037
TR97	GCTGTCAGTCTTTGAAGCCGTGG	Gh_A03G1622
TR98	ACCTGGATAACTTCAGCAAGCGG	Gh_A13G1568	Gh_D13G1905
TR99	CTCTGCACTGAATATTTGGTTGG	Gh_A13G1568	Gh_D13G1905
TR100	AAACAGGTCAGATAACCCATTGG	Gh_A11G3271	Gh_D11G2831	Gh_Sca065452G01
TR101	TCCCTTGTATTGTACCCTGATGG	Gh_A11G3271	Gh_D11G2831	Gh_Sca065452G01
TR102	AATCCTCAACCGCAAAGTGGCGG	Gh_A09G0654	Gh_D09G0656
TR103	TGTCGTTTCCGGAAGTAGGAGGG	Gh_A09G0654
TR104	GCCGAATCCAGCGTAAGAAGCGG	Gh_A11G2419	Gh_D11G2736
TR105	GAATCCAGCGTAAGAAGCGGCGG	Gh_A11G2419	Gh_D11G2736
TR106	GTAAGTTCGTTGACCTTCGAGGG	Gh_A06G0364	Gh_D06G0395
TR107	GCCAACGCGAGAGTGCATGGCGG	Gh_A06G0364	Gh_D06G0395
TR108	AGTCAACAGAGAGACTACGGAGG	Gh_A05G2316	Gh_D05G2577	Gh_Sca069103G01
TR109	CCACAGGAATAGTAACTCGATGG	Gh_A05G2316	Gh_D05G2577	Gh_Sca069103G01
TR110	TATCTCAGTCTGAATAGTGGTGG	Gh_A02G1275	Gh_D03G0417
TR111	TCAAGGAAGCGACAGCTTGGTGG	Gh_A02G1276	Gh_D03G0417	Gh_D03G0416
TR112	GCAGGACCAGGAATAGCTGGTGG	Gh_A02G0192	Gh_D02G0255
TR113	GACTTGGTGGACAAACCGGTTGG	Gh_A02G0192	Gh_D02G0255
TR114	GCCGTCATAGAATATTCAAGAAG	Gh_A12G0439	Gh_D12G0440
TR115	GCTAATGGTTATCCAAAGAGAGG	Gh_A12G0439	Gh_D12G0440	Gh_A01G0794
TR116	TCTCGTTACCACCATAAACGTGG	Gh_Sca070505G01	Gh_A10G1137	Gh_D10G1360
